# Supplementary material for: Physical and stoichiometric controls on stream respiration in a headwater stream
Source: Copernicus journal article supplement (doi:10.5194/bg-20-3353-2023), 2023-08-11
Supplement: Supplementary file 1 [file bg-20-3353-2023-supplement.pdf]

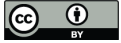

*Supplement of*

## **Physical and stoichiometric controls on stream respiration in a headwater stream**

**Jancoba Dorley et al.**

*Correspondence to:* Ricardo González-Pinzón ([gonzaric@unm.edu](mailto:gonzaric@unm.edu))

The copyright of individual parts of the supplement might differ from the article licence.

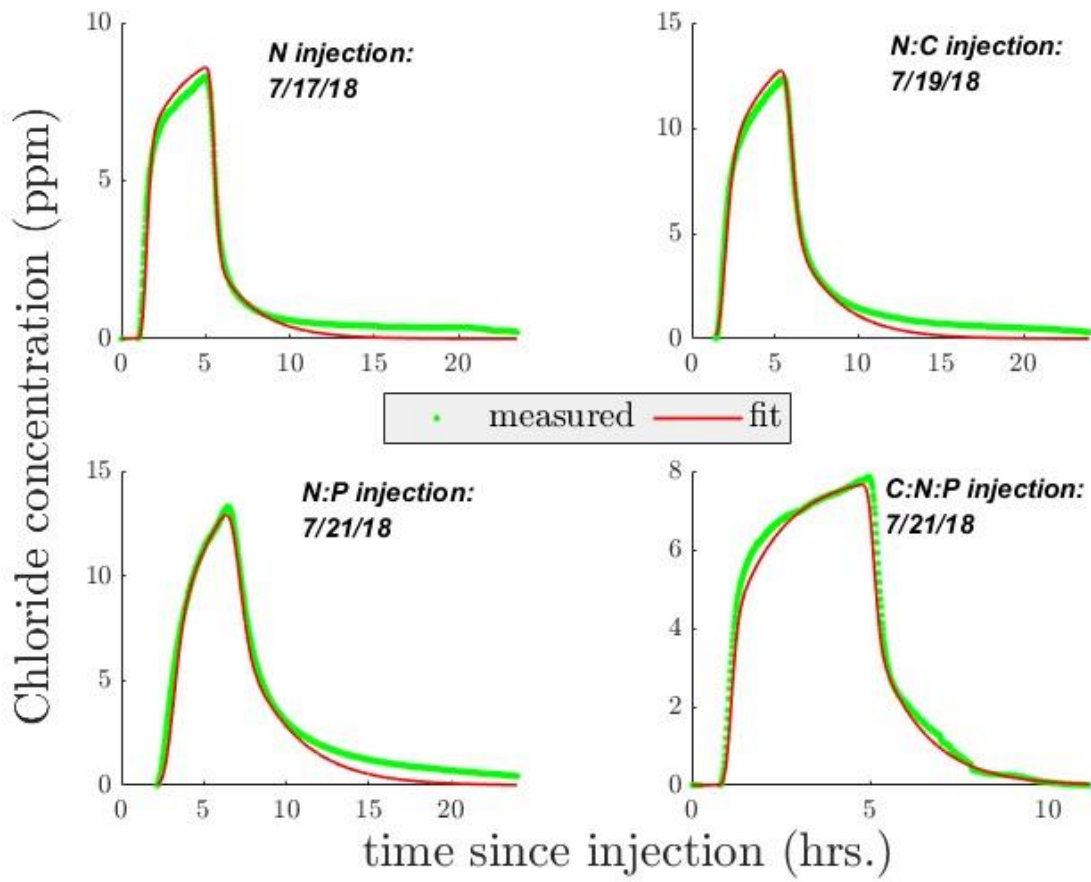

**Figure S1.** Example of tracer breakthrough curves for measured (dotted) and fitted (line) chloride concentrations for the second round of injections (round 2).

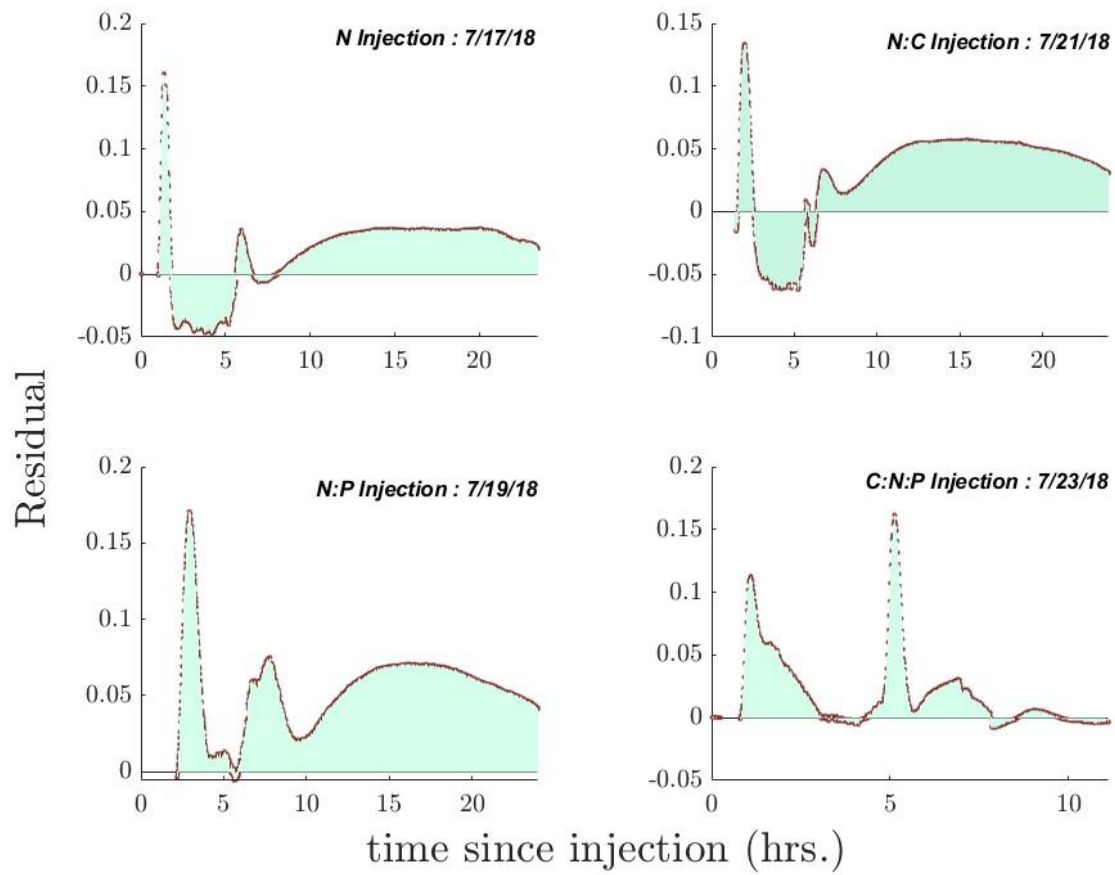

**Figure S2.** Example of residual plots from measured vs. fitted chloride concentration BTCs.

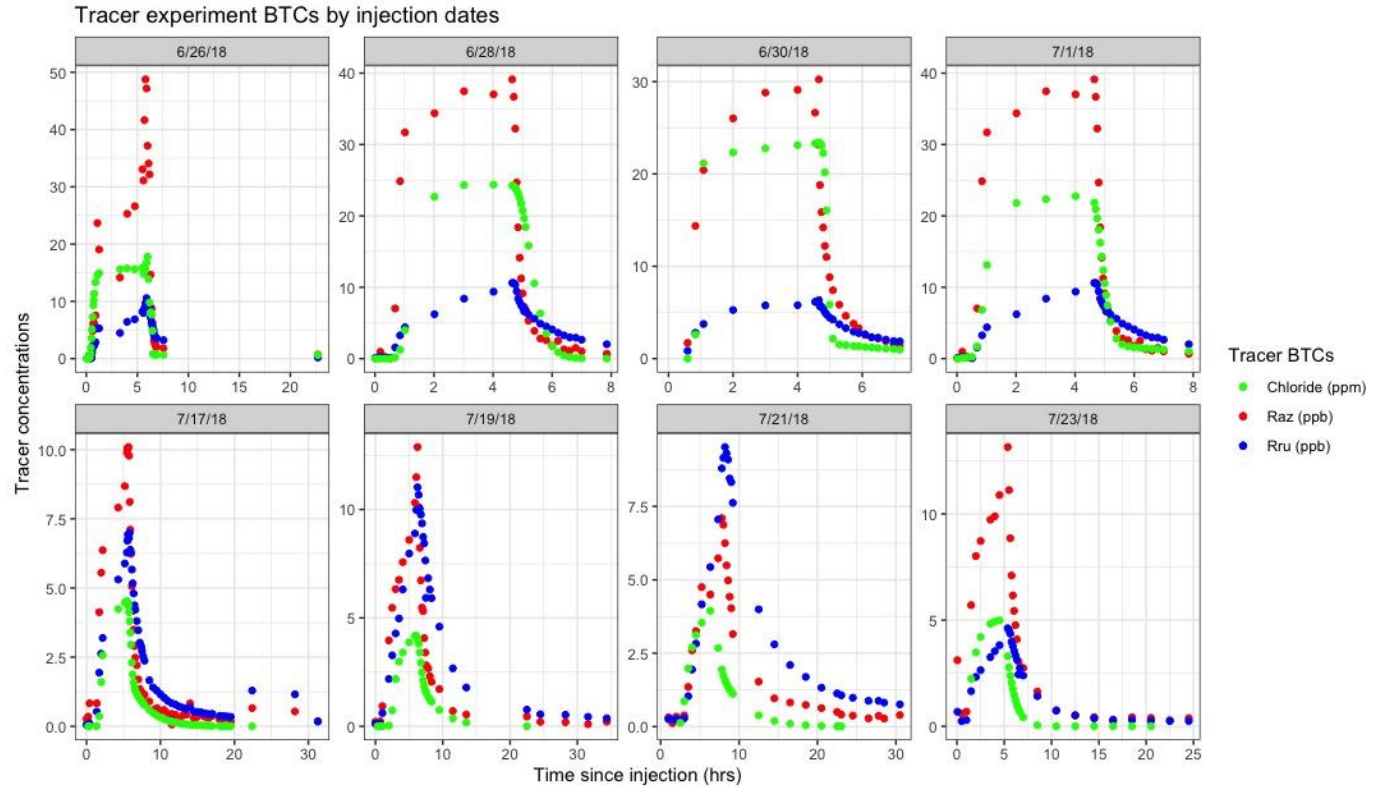

**Figure S3.** Example of tracer BTCs obtained from grab sampling for resazurin, resorufin and chloride concentrations for rounds 1 and 2.

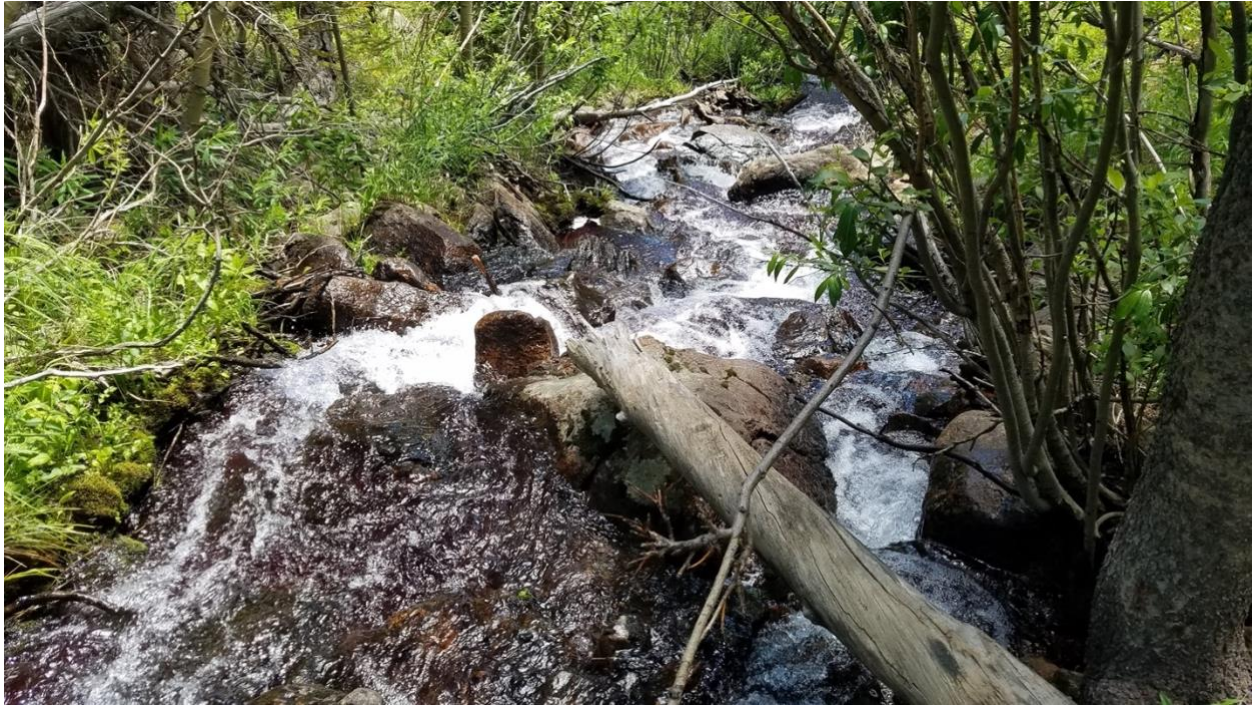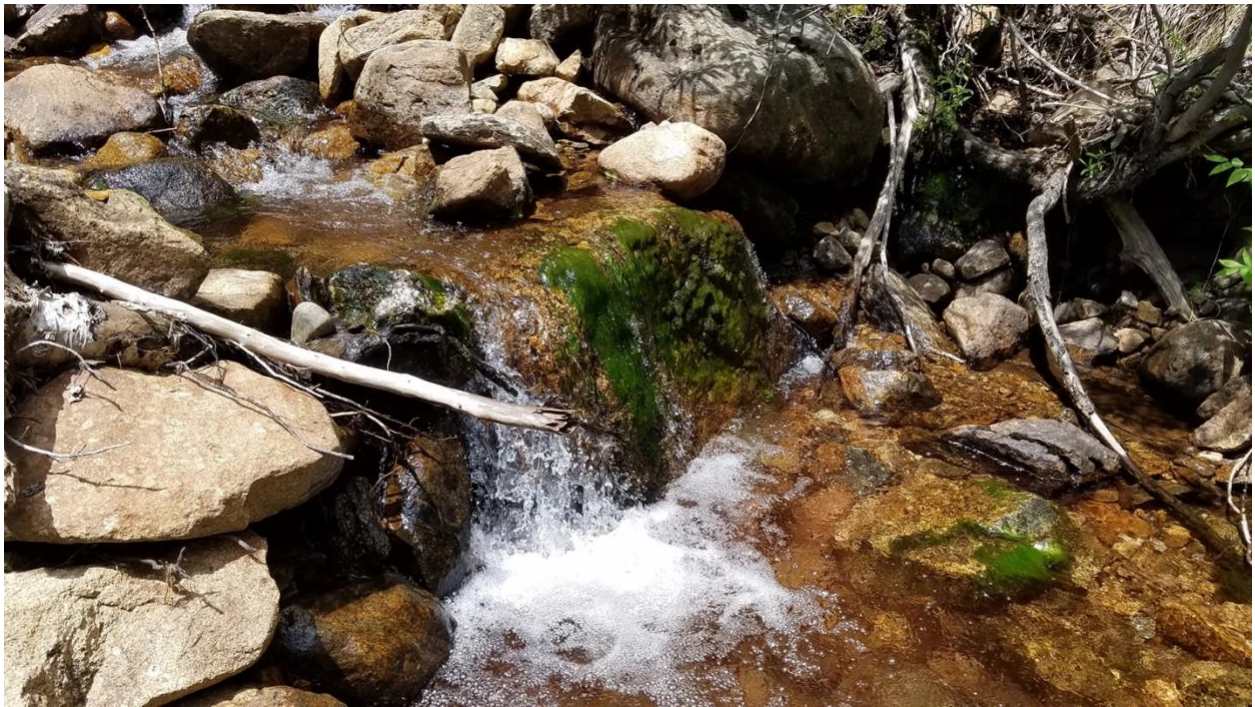

**Figure S4.** Photos from Como Creek taken on June 26, 2018, during the first round of experiments (top) and on July 17, 2018, during the second round. Between the two rounds we observed flow recession and algae growth.
